# Supplementary material for: Tryptophan Metabolites as Biomarkers for Esophageal Cancer Susceptibility, Metastasis, and Prognosis
Source: Front Oncol. 2022 Feb 28;12:800291. doi: 10.3389/fonc.2022.800291 (PMC8918692; doi:10.3389/fonc.2022.800291)
Supplement: Supplementary file 3 [file Table_3.xlsx]

## Sheet: Sheet 1
Table S3. Effects of baseline characteristics on plasma levels of metabolites and metabolite ratios in control subjects.
Characteristics	N (%) or Median (IQR)	Plasma TRP concentration (ng/mL)						Plasma KYN concentration (ng/mL)						Plasma KYNA concentration (ng/mL)						Plasma XA concentration (ng/mL)						Plasma 3-HAA concentration (ng/mL)						Plasma 5-HT concentration (ng/mL)						Plasma 5-HIAA concentration (ng/mL)						Plasma IPA concentration (ng/mL)
		Univariate Analysis		Multivariate Analysis				Univariate Analysis		Multivariate Analysis				Univariate Analysis		Multivariate Analysis				Univariate Analysis		Multivariate Analysis				Univariate Analysis		Multivariate Analysis				Univariate Analysis		Multivariate Analysis				Univariate Analysis		Multivariate Analysis				Univariate Analysis		Multivariate Analysis
		Estimate	p	Estimate	p	Partial R2	Adjusted R2	Estimate	p	Estimate	p	Partial R2	Adjusted R2	Estimate	p	Estimate	p	Partial R2	Adjusted R2	Estimate	p	Estimate	p	Partial R2	Adjusted R2	Estimate	p	Estimate	p	Partial R2	Adjusted R2	Estimate	p	Estimate	p	Partial R2	Adjusted R2	Estimate	p	Estimate	p	Partial R2	Adjusted R2	Estimate	p	Estimate	p	Partial R2	Adjusted R2
Demographic data							0.2319						0.3516						0.1249						0.1598						0.0406						0.1443						0.0905						0.0528
Total number	456
Age, years	48.00 (37.50, 56.00)	-0.00104972	0.1083					0.00630729	<.0001	0.00654	<.0001	0.1347		0.00464002	<.0001	0.0044	0.0048	0.0211		-0.00428651	<.0001	-0.00578	<.0001	0.0472		0.00254725	0.166					-0.00619912	0.0046	-0.0081	0.0008	0.0287		0.00425474	0.0725					0.00667875	0.0474	0.00717	0.0305	0.011
Sex	Female:211 (46.27)	0.0914702	<.0001					0.0556333	0.03	-0.22012	<.0001	0.0491		0.0212929	0.4754					0.173613	<.0001	0.16176	<.0001	0.0929		-0.0298274	0.5221					0.0666508	0.2497					-0.327315	<.0001	-0.33239	<.0001	0.0937		-0.393143	<.0001	-0.3992	<.0001	0.0465
	Male:245 (53.73)
Blood routine examination
WBC, 109/L	6.51 (5.61, 7.55)	0.0160203	0.0025					0.0327369	<.0001					0.0299243	0.0011					0.0119276	0.1672					0.0264332	0.064					0.034576	0.0511					0.00376274	0.8383					-0.0159541	0.5566
NE, %	54.20 (49.10, 59.70)	-0.00252433	0.0168					-0.00107331	0.4993					-0.000637252	0.7301					-0.00493146	0.0039					-0.0070783	0.0129	-0.00635	0.0447	0.0175		-0.000216815	0.9523					0.00731669	0.0488					0.00218311	0.6916
RBC, 1012/L	4.82 (4.53, 5.18)	0.139526	<.0001	0.08542	<.0001	0.1641		0.0979594	0.0001	0.09796	0.0001	0.0289		0.0660578	0.0255					0.144357	<.0001					-0.0215802	0.639					0.0403588	0.4816					-0.135116	0.0218					-0.275022	0.0018
HGB, g/L	149.00 (139.00, 160.00)	0.00395406	<.0001					0.002294	0.0038					0.00234548	0.0107					0.00412792	<.0001					-0.00188147	0.1852					-0.0015287	0.3887					-0.00591648	0.0011					-0.0105885	0.0001
PLT, 109/L	225.00 (188.00, 256.00)	-0.000296698	0.0308					-8.7193e-05	0.6731					-0.000187876	0.4329					-0.000311899	0.1631					0.000412209	0.2449					0.00351338	<.0001	0.00285	<.0001	0.1089		0.000753798	0.1005					-1.9233e-05	0.9783
Biochemical measurements
GGT, U/L	26.00 (19.00, 40.00)	0.000379652	0.0756					0.000851312	0.0085					0.000458906	0.2134					0.000773513	0.0254					-0.000258431	0.6873					-0.000120409	0.8643					-0.00101551	0.2712					-0.00123971	0.2754
AST, U/L	27.00 (23.00, 41.00)	0.00335599	0.001					0.00846716	<.0001					0.00682527	0.0001					0.00370596	0.0258	0.00559	0.0011	0.0271		0.00580672	0.0408					-0.00441925	0.2069					-0.00411394	0.3133					0.00160154	0.7662
ALT, U/L	24.00 (19.00, 34.00)	0.00306791	<.0001					0.00355979	<.0001	0.00277	<.0001	0.0389		0.00375058	<.0001	0.00246	0.0111	0.0169		0.0031195	0.0001					0.00292481	0.0265	0.00331	0.0076	0.0316		0.0009043	0.6008					-0.0028595	0.1044					-0.0040604	0.1222
ALP, U/L	76.00 (63.00, 91.00)	0.00133371	0.0008					0.00283022	<.0001	0.0014	0.0077	0.0138		0.00116716	0.0893					0.000826353	0.2013					0.000564141	0.5934					0.00263457	0.0484	0.00297	0.0174	0.0141		-0.001451	0.3032					-0.000864334	0.6916
LDH, U/L	175.00 (154.00, 198.00)	0.000608309	0.0404					0.00242874	<.0001					0.00243883	<.0001	0.00139	<.0001	0.0599		-0.000876436	0.0688					0.00171504	0.0374					-0.000465055	0.6398					-0.000243128	0.8273					0.000508875	0.7577
TPROT, g/L	75.10 (72.30, 77.60)	0.000218246	0.9158					0.00536632	0.0834					0.00721122	0.0451					3.4785e-05	0.9917					0.00826481	0.1464					0.0148707	0.0329					0.00468529	0.5311					0.00466989	0.6663
ALB, g/L	45.95 (44.40, 47.70)	0.014588	<.0001					-0.0105404	0.0368					-0.00485652	0.4087					0.0193754	0.0004					-0.0071256	0.4587					0.0324513	0.004					-0.034359	0.0043					-0.0384844	0.0269
GLB, g/L	29.05 (26.70, 31.50)	-0.00666502	0.0039					0.0117999	0.0007					0.011428	0.0047					-0.00917482	0.0149					0.0127317	0.0393					0.00311046	0.691					0.0235624	0.0059					0.0245094	0.0429
ALB/GLB	1.58 (1.43, 1.75)	0.154508	<.0001					-0.196939	0.0006					-0.169433	0.0114					0.224435	0.0003					-0.206132	0.0498					0.125483	0.3316					-0.542579	0.0002					-0.523577	0.009
CREA, μmol/L	75.00 (60.00, 86.00)	0.000791678	0.07					0.00502552	<.0001	0.00737	<.0001	0.0977		0.00499783	<.0001	0.00276	0.0002	0.0373		0.00268406	0.0001					0.000218714	0.8407					0.00247306	0.09					-0.00367346	0.0113					-0.0035334	0.114
GLU, mmol/L	5.38 (5.06, 5.84)	-0.0117975	0.0944					-0.00731993	0.4938					0.00756046	0.5448					-0.0110449	0.3398					0.0198428	0.2701					0.023345	0.3275					-0.0447399	0.1569					-0.0655772	0.0655
Variables with p < 0.05 were entered into the multivariable model, and only variables with p < 0.05 were retained in the model. Abbreviations as in Table 1 and S2.
[truncated: 60 more columns]
